# Supplementary material for: Annual memory in the terrestrial water cycle
Source: Copernicus journal article supplement (doi:10.5194/egusphere-2024-2954), 2024-09-25
Supplement: Supplementary file [file egusphere-2024-2954-AC1-supplement.pdf]

Dear Dr. Roderick,

Thank you for this constructive review. Please find our responses below (**in bold**).

Best regards,

Wouter Berghuijs (on behalf of all authors)

---

This manuscript describes an initial evaluation of autocorrelation in catchment water balance components on a global basis.

The topic is highly suitable for the journal.

The manuscript is interesting, very well written and easy to follow.

I had very few substantive comments and the paper can be published more or less as is.

**We appreciate this constructive review.**

Line 53. I was pleased to see the caveat about inter-basin flows. I suspect this could be extended to land-ocean transfers as well. (If you are curious, google “wonky holes” and have a read. I have personally drunk fresh water over the side of a boat 50 km from land on the Great Barrier Reef. The local fisherman have known this for a long long time.)

**In the revised manuscript, we will also mention land-ocean transfers. I was unaware of *wonky holes*, but they provide an excellent illustration of why land-ocean transfers should be mentioned.**

Line 107. Typo? Should it be Sun et al 2018 (and not 2017) or is there another reference?

**It indeed should be 2018. In the revised manuscript, we will correct this.**

Line 114. Perhaps ..... Thus py **roughly** expresses. Or “**approximately**” instead of roughly if you like but you need a qualifier here.

**In the revised manuscript, we will add the qualifier “approximately”.**

Figure 2e. Can you speculate on a likely physical explanation for the negative autocorrelation values, that occur in different climates, e.g. semi-arid South Western Australia, Botswana, bottom of South America, and in the cold parts of northern Russia and in other widely varying climates?

**In the revised manuscript, we will speculate on the potential physical (and statistical) causes of this negative autocorrelation.**

Figure 2eik. Focus on South Western Australia. You have autocorrelations as follows; -ve for rootzone (Fig 2e), -ve for evaporation (Fig 2i) and 0 for annual flow (Fig. 2k). Makes sense since in that region there is minimal streamflow and I would interpret this as a good plant growing year (enhanced evaporation) depletes rootzone moisture. But I could not imagine how that would work in northern Russia with the same spatial patterns as above. No change requested but I was intrigued. (I had personally imagined a study like this for years and am glad that it has now been done.)

**In the revised manuscript, we will briefly discuss the potential causes.**

Line 339. Typo? .. used **thus** far cause

**We will correct this.**
